# Supplementary material
Source: publisher figshare collection journal article supplement (https://frontiersin.figshare.com/ndownloader/files/27597986)
Supplement: Supplementary file [file 27597986]

## *Supplementary Material*

### 1 Supplementary Figures and Tables

#### 1.1 Supplementary Figures

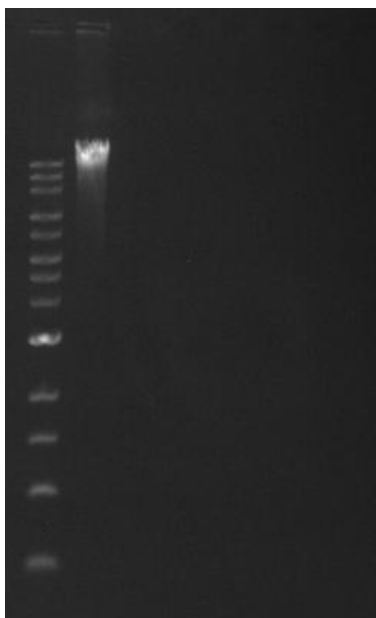

**Supplementary Figure 1.** 0.5  $\mu$ g of DNA extracted from the physically treated *L. fusiformis* visualized on a 0.5% agarose gel alongside a NEB 1 kb extend ladder (N3239S), the largest band of which is 48.5 kb. This DNA was size selected and used for Nanopore sequencing.

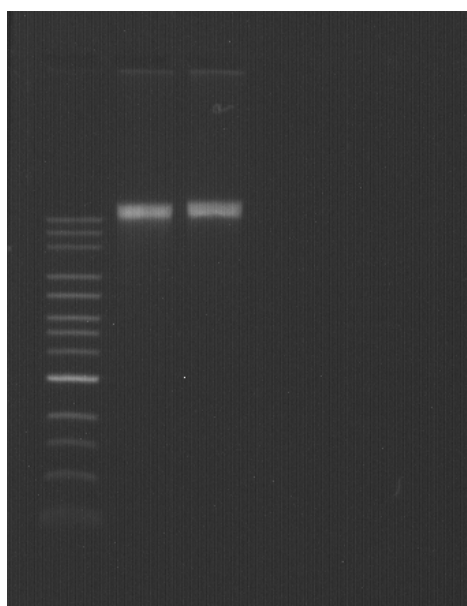

**Supplementary Figure 2.** 0.5  $\mu$ g of DNA extracted from the axenic *L. fusiformis* visualized on a 0.5% agarose gel alongside a NEB 1 kb extend ladder (N3239S), the largest band of which is 48.5 kb. Lane 2 is from the main DNA extraction, and lane 3 is from a back-extraction.

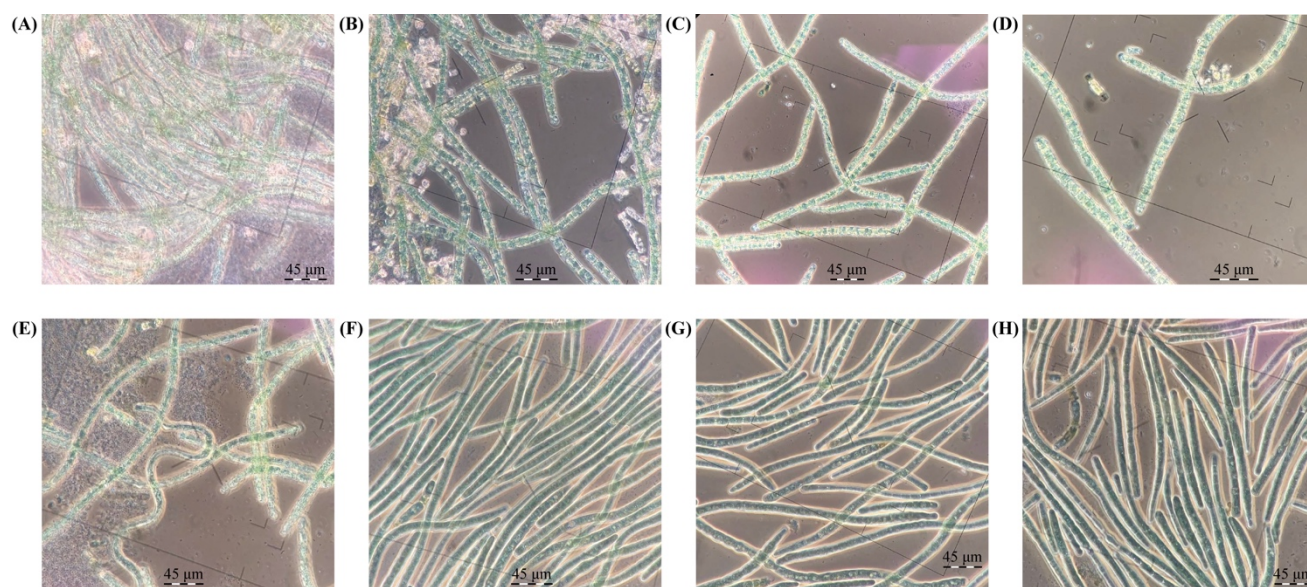

**Supplementary Figure 3.** (A-D) Floating *L. fusiformis* cells after centrifugation at (A) 2000 g, (B) 4000 g, (C) 8000 g, (D) 16000 g. (E-H) Pelleted *L. fusiformis* cells after centrifugation at (E) 2000 g, (F) 4000 g (G) 8000 g, (H) 16000 g.

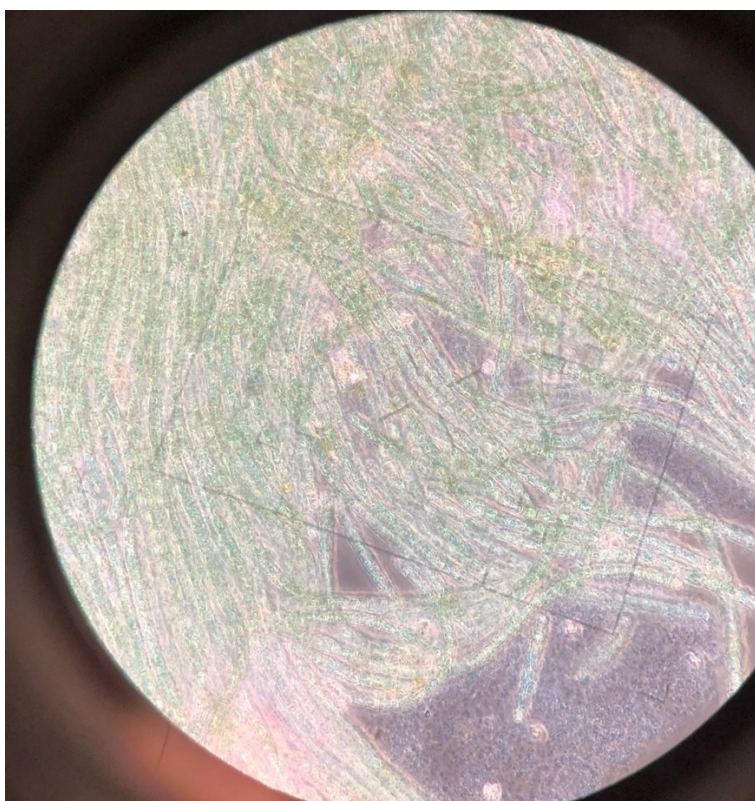

**Supplementary Figure 4.** Uncropped phase contrast image of Figure S3A.



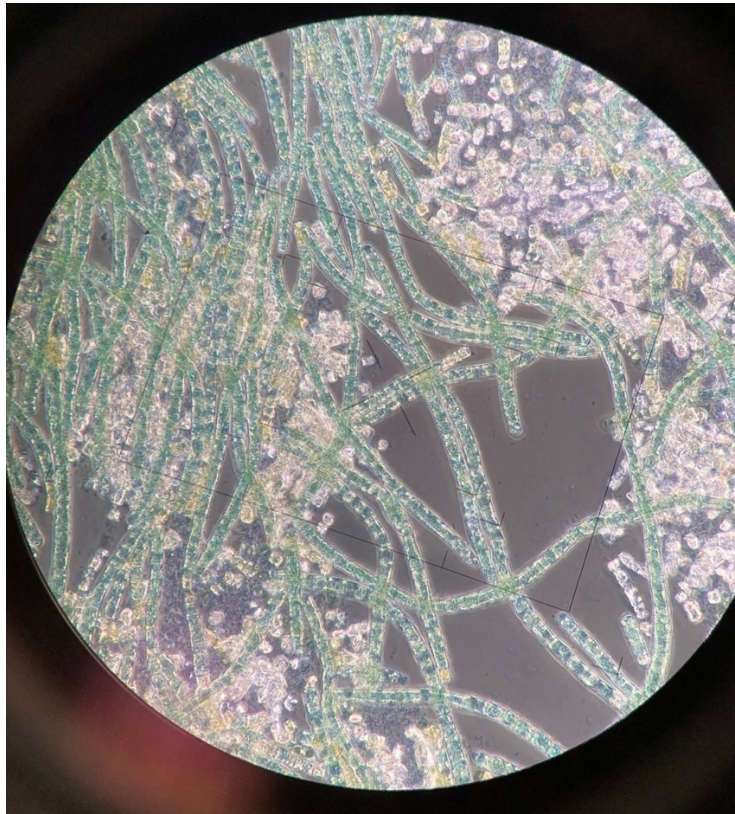

**Supplementary Figure 5.** Uncropped phase contrast image of Figure S3B.

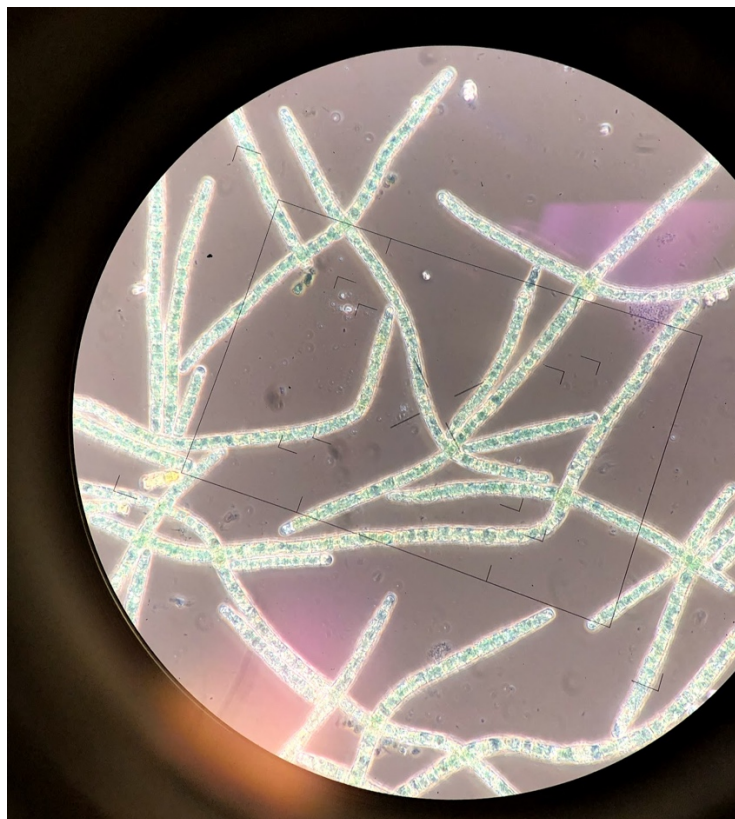

**Supplementary Figure 6.** Uncropped phase contrast image of Figure S3C.

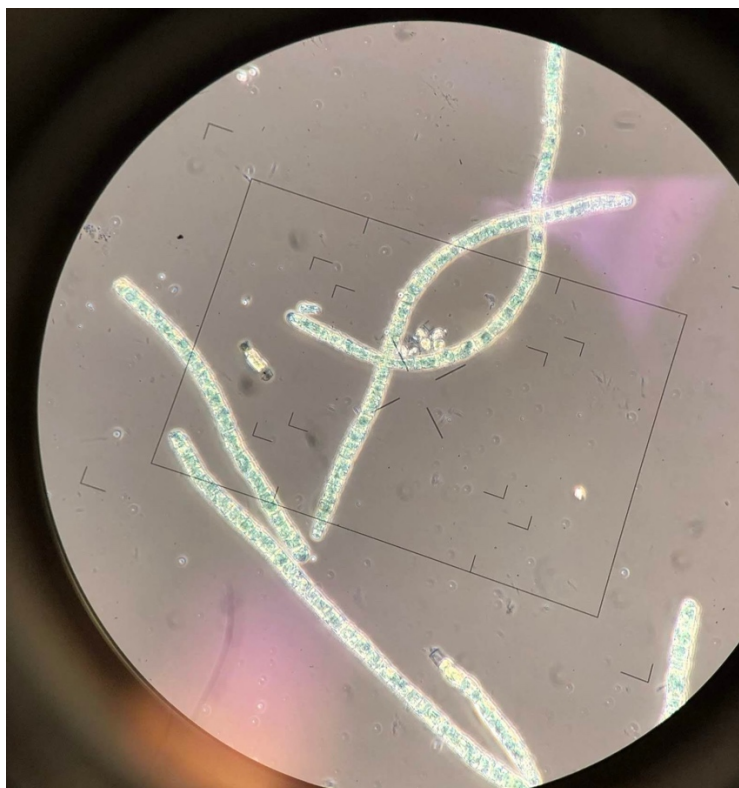

**Supplementary Figure 7.** Uncropped phase contrast image of Figure S3D.

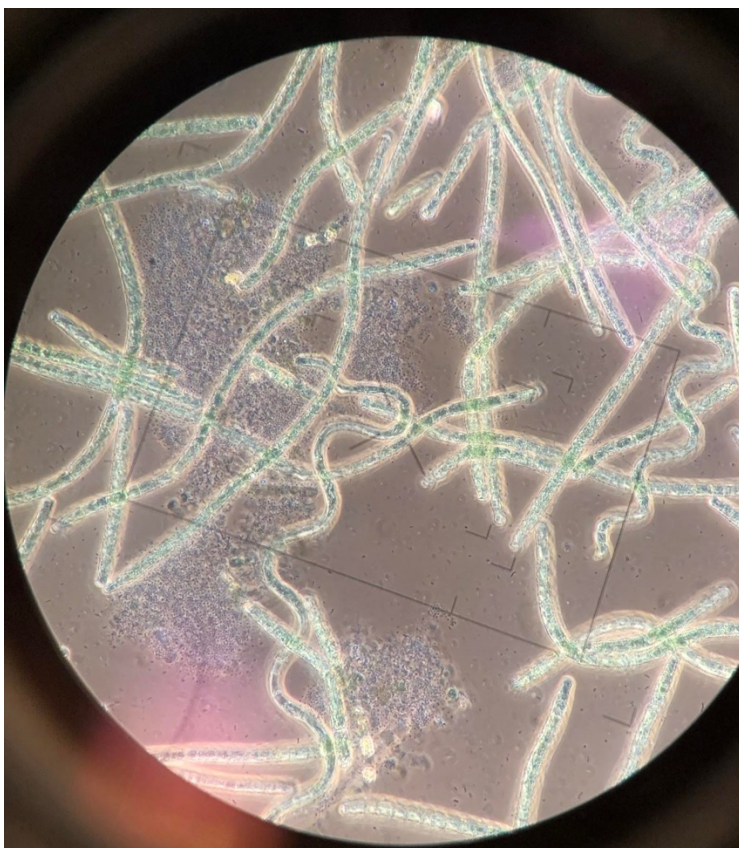

**Supplementary Figure 8.** Uncropped phase contrast image of Figure S3E.



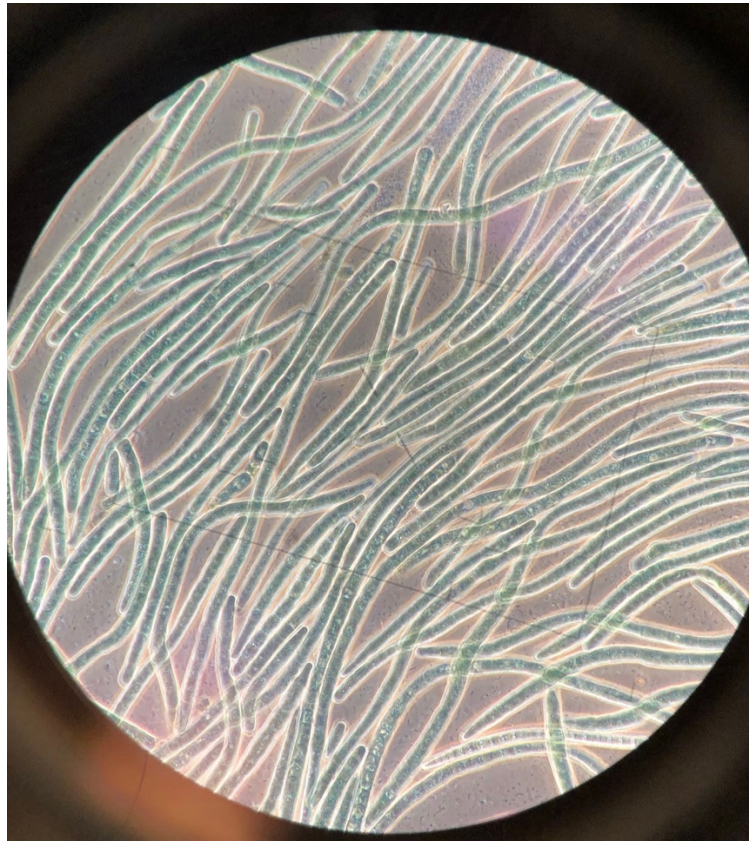

**Supplementary Figure 9.** Uncropped phase contrast image of Figure S3F.

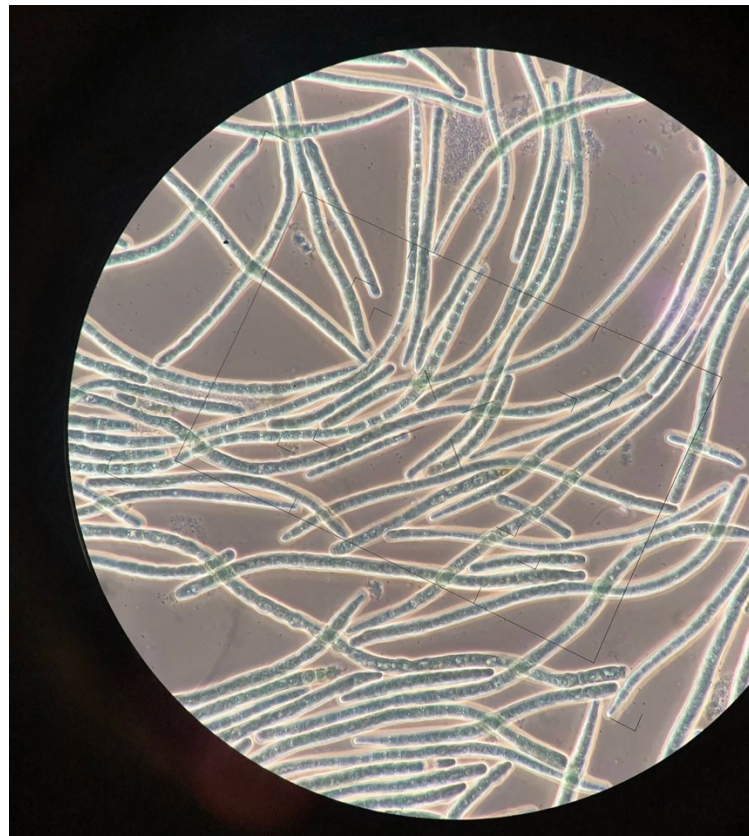

**Supplementary Figure 10.** Uncropped phase contrast image of Figure S3G.



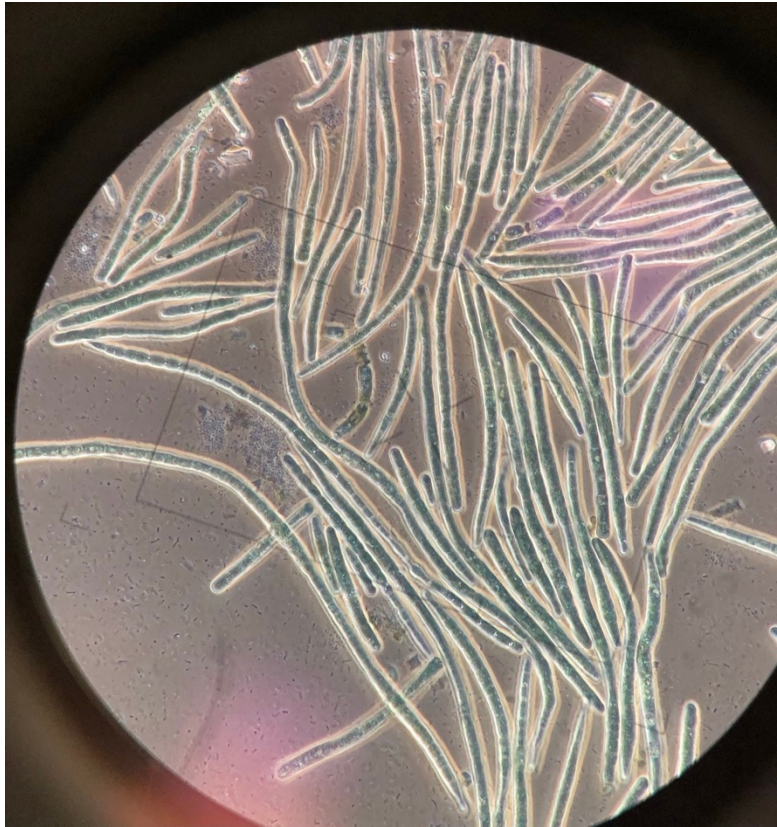

**Supplementary Figure 11.** Uncropped phase contrast image of Figure S3H.

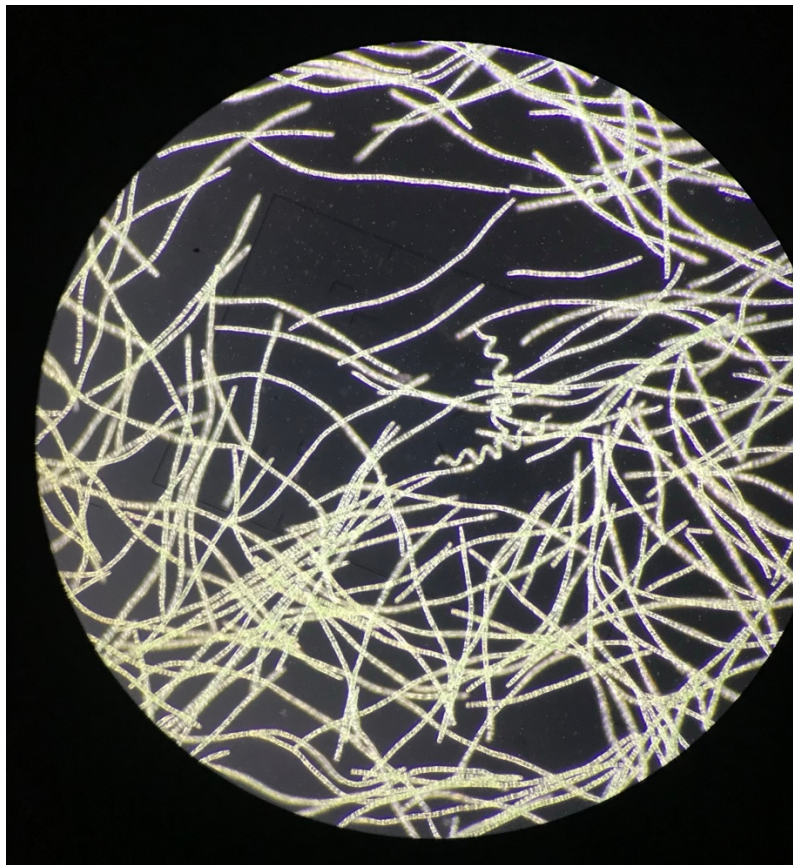



**Supplementary Figure 12.** Uncropped dark field image from Figure 3A.

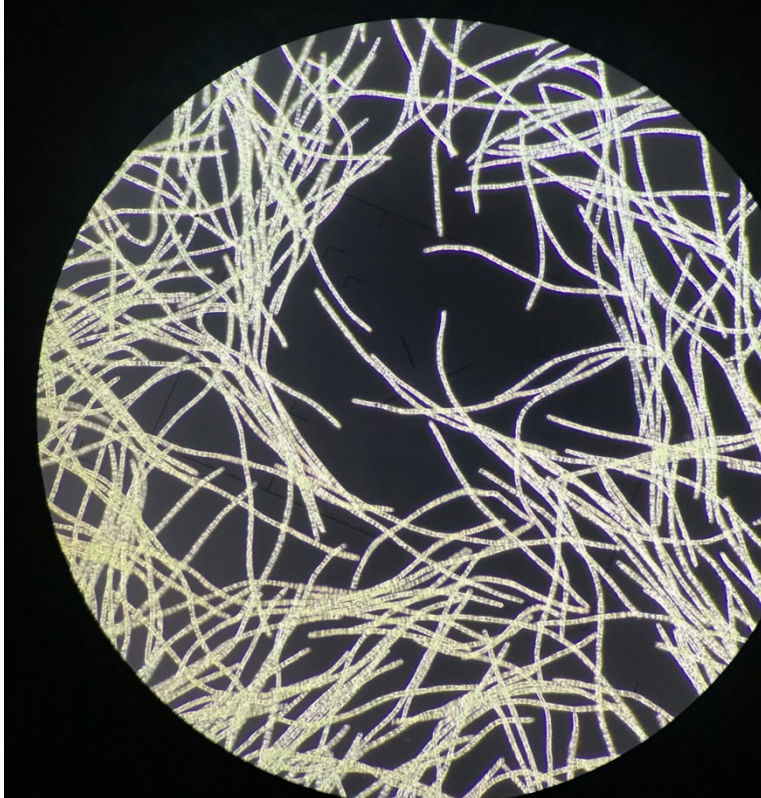

**Supplementary Figure 13.** Uncropped dark field image from Figure 3B.

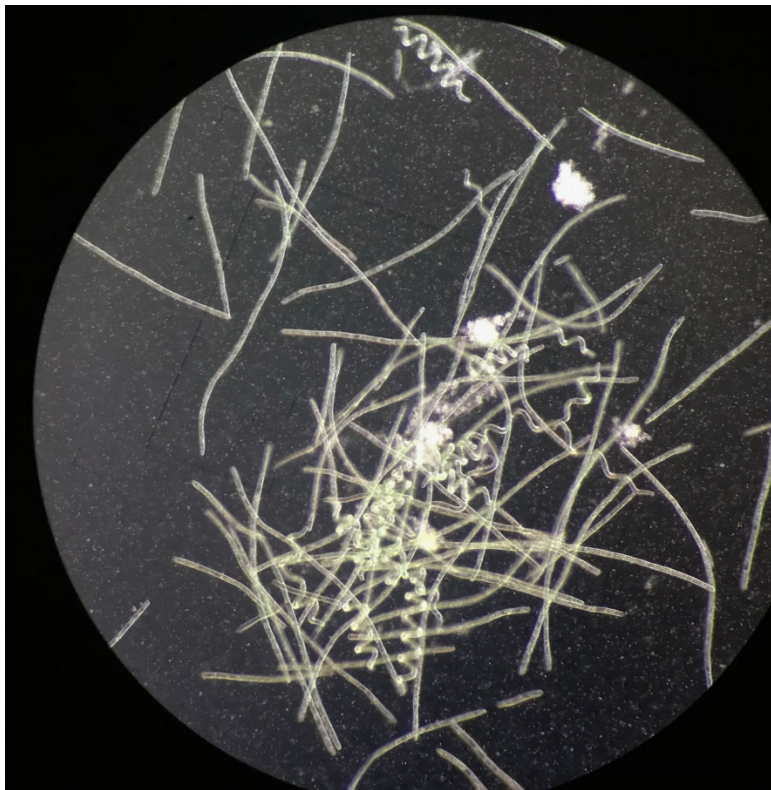

**Supplementary Figure 14.** Uncropped dark field image used for Figure 3C.

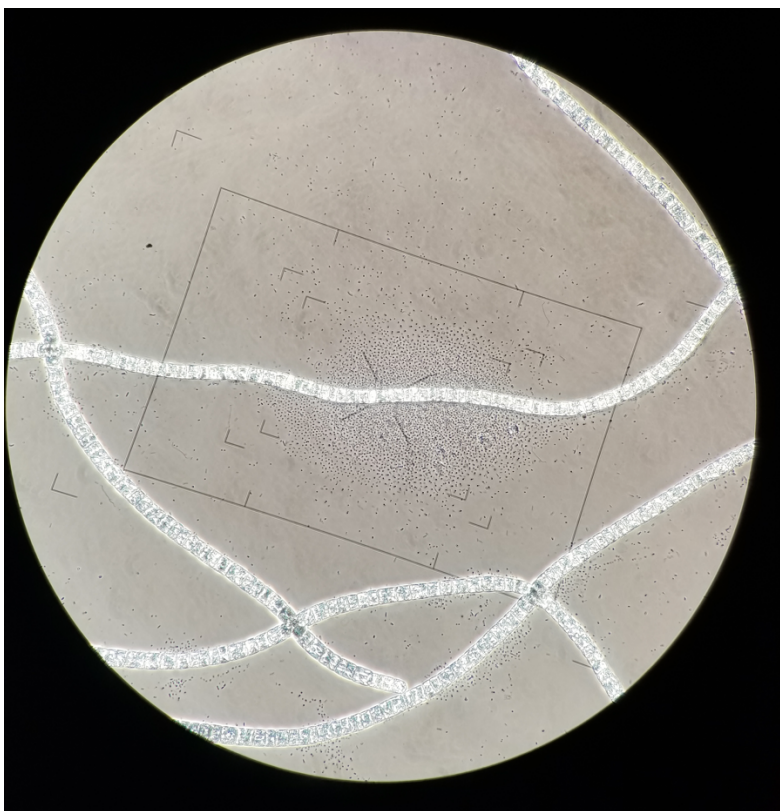

**Supplementary Figure 15.** Uncropped phase contrast image used for Figure 3D.

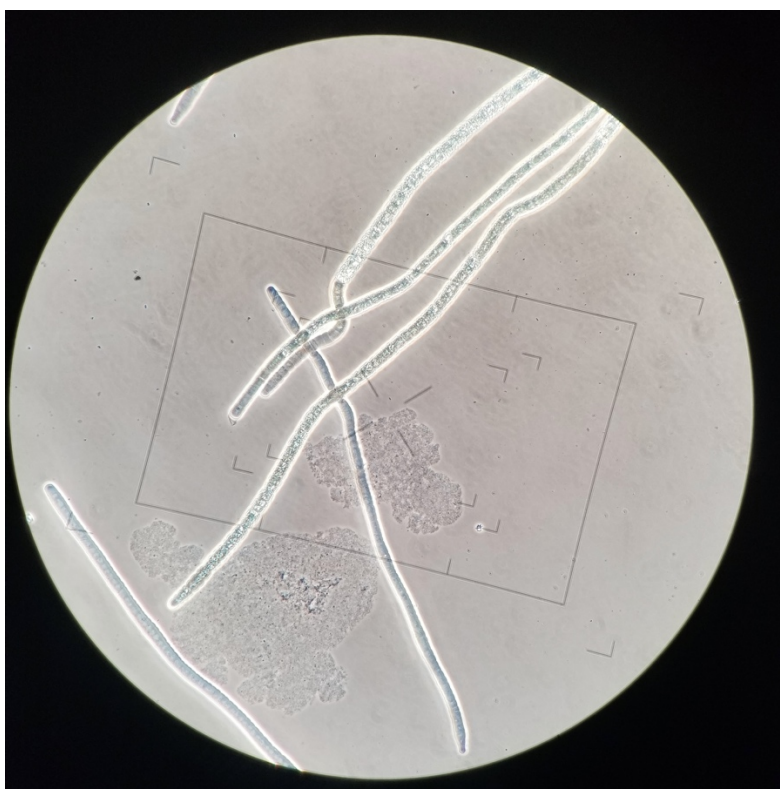

**Supplementary Figure 16.** Uncropped phase contrast image used for Figure 3E.



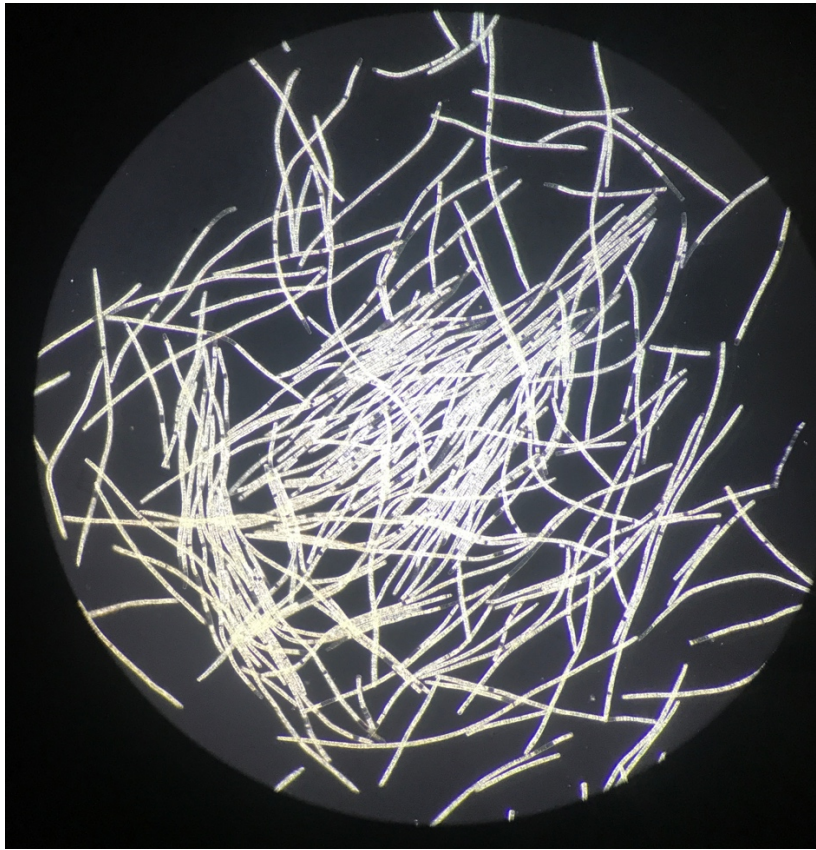

**Supplementary Figure 17.** Uncropped dark field image used for Figure 3F.
